# Supplementary material
Source: PubMed Central journal article supplement (PMC7140101)
Supplement: NIHMS1026979-supplement-Supplemental_Material_1.pdf [file NIHMS1026979-supplement-Supplemental_Material_1.pdf]

Table S1. Descriptive statistics and correlations for alcohol variables and mental health symptoms

|                  | 1.   | 2.   | 3.   | 4.   | 5.   | 6.   | 7.   | 8.   | 9.   | 10.  | 11.  | 12.  | 13.  | 14.  | 15.  | 16.  | 17.  | 18.  | 19.  | 20.  | 21.  |
|------------------|------|------|------|------|------|------|------|------|------|------|------|------|------|------|------|------|------|------|------|------|------|
| 1. Coping W7     | 1    |      |      |      |      |      |      |      |      |      |      |      |      |      |      |      |      |      |      |      |      |
| 2. Coping W8     | .59  | 1    |      |      |      |      |      |      |      |      |      |      |      |      |      |      |      |      |      |      |      |
| 3. Coping W9     | .51  | .61  | 1    |      |      |      |      |      |      |      |      |      |      |      |      |      |      |      |      |      |      |
| 4. Soc/Enh W7    | .35  | .32  | .34  | 1    |      |      |      |      |      |      |      |      |      |      |      |      |      |      |      |      |      |
| 5. Soc/Enh W8    | .22  | .40  | .30  | .68  | 1    |      |      |      |      |      |      |      |      |      |      |      |      |      |      |      |      |
| 6. Soc/Enh W9    | .23  | .37  | .49  | .60  | .70  | 1    |      |      |      |      |      |      |      |      |      |      |      |      |      |      |      |
| 7. Depression W7 | .50  | .32  | .32  | .13  | .12  | .11  | 1    |      |      |      |      |      |      |      |      |      |      |      |      |      |      |
| 8. Depression W8 | .45  | .43  | .45  | .17  | .19  | .12  | .68  | 1    |      |      |      |      |      |      |      |      |      |      |      |      |      |
| 9. Depression W9 | .33  | .40  | .50  | .18  | .18  | .19  | .61  | .76  | 1    |      |      |      |      |      |      |      |      |      |      |      |      |
| 10. Soc Anx W7   | .47  | .44  | .30  | .12  | .18  | .10  | .59  | .56  | .52  | 1    |      |      |      |      |      |      |      |      |      |      |      |
| 11. Soc Anx W8   | .42  | .49  | .41  | .14  | .21  | .17  | .47  | .61  | .55  | .80  | 1    |      |      |      |      |      |      |      |      |      |      |
| 12. Soc Anx W9   | .35  | .42  | .49  | .13  | .21  | .20  | .47  | .55  | .64  | .76  | .83  | 1    |      |      |      |      |      |      |      |      |      |
| 13. External W7  | .43  | .30  | .25  | .36  | .29  | .20  | .55  | .45  | .38  | .24  | .19  | .17  | 1    |      |      |      |      |      |      |      |      |
| 14. External W8  | .34  | .40  | .39  | .36  | .38  | .27  | .48  | .61  | .52  | .29  | .29  | .29  | .78  | 1    |      |      |      |      |      |      |      |
| 15. External W9  | .30  | .38  | .44  | .32  | .31  | .31  | .40  | .54  | .63  | .24  | .30  | .32  | .67  | .82  | 1    |      |      |      |      |      |      |
| 16. Alc Quant W7 | .21  | .08  | .07  | .37  | .21  | .21  | .04  | .00  | .04  | -.08 | -.05 | -.04 | .26  | .14  | .13  | 1    |      |      |      |      |      |
| 17. Alc Quant W8 | .08  | .06  | .10  | .34  | .38  | .31  | -.05 | -.06 | .02  | -.10 | -.10 | -.06 | .19  | .23  | .20  | .45  | 1    |      |      |      |      |
| 18. Alc Quant W9 | .02  | -.06 | .05  | .26  | .29  | .26  | -.11 | -.11 | -.09 | -.14 | -.14 | -.13 | .01  | .05  | .05  | .19  | .51  | 1    |      |      |      |
| 19. Alc Prob W7  | .40  | .28  | .22  | .44  | .28  | .21  | .26  | .25  | .23  | .16  | .12  | .11  | .47  | .40  | .39  | .38  | .32  | .16  | 1    |      |      |
| 20. Alc Prob W8  | .21  | .32  | .28  | .43  | .44  | .32  | .14  | .22  | .25  | .04  | .05  | .06  | .40  | .52  | .52  | .30  | .47  | .25  | .64  | 1    |      |
| 21. Alc Prob W9  | .18  | .33  | .41  | .37  | .38  | .40  | .13  | .18  | .22  | .03  | .05  | .11  | .37  | .41  | .50  | .29  | .37  | .31  | .46  | .77  | 1    |
| Mean             | 1.78 | 1.75 | 1.71 | 2.99 | 3.03 | 3.02 | .41  | .43  | .45  | 1.06 | 1.01 | 1.06 | .37  | .38  | .38  | 2.61 | 2.54 | 2.57 | 6.55 | 7.97 | 7.68 |
| Standard Dev.    | .80  | .71  | .73  | .99  | .92  | .94  | .32  | .35  | .37  | .75  | .74  | .75  | .27  | .28  | .29  | 3.12 | 2.57 | 2.35 | 6.90 | 7.55 | 7.49 |
| Skewness         | 1.43 | 1.00 | 1.53 | -.22 | -.23 | -.15 | 1.18 | 1.28 | 1.07 | 1.09 | 1.03 | 1.05 | 1.11 | 1.22 | 1.28 | 1.61 | 1.16 | 1.35 | 1.97 | 1.45 | 1.58 |
| Kurtosis         | 2.11 | .49  | 2.82 | -.84 | -.88 | -.76 | 1.06 | 1.48 | .62  | 1.23 | .86  | 1.05 | 1.13 | 2.43 | 2.65 | 3.01 | .73  | 1.82 | 5.68 | 2.26 | 2.69 |
| Minimum          | 1.00 | 1.00 | 1.00 | 1.00 | 1.00 | 1.00 | 0    | 0    | 0    | 0    | 0    | 0    | 0    | 0    | 0    | 0    | 0    | 0    | 0    | 0    | 0    |
| Maximum          | 5.00 | 4.20 | 5.00 | 5.00 | 4.90 | 5.00 | 1.64 | 1.71 | 1.64 | 3.79 | 3.31 | 3.78 | 1.31 | 1.82 | 1.83 | 15.5 | 11.2 | 12.0 | 45   | 38   | 39   |

Note. Coping = Coping Motives; Soc/Enh = Social and Enhancement Motives; Depression = Depression Symptoms; Soc Anx = Social Anxiety Symptoms; External = Externalizing Symptoms; Alc Quant = Quantity of Alcohol Use; Alc Prob = Alcohol Problem; *Italicized* = *Stability estimates*
