# Supplementary material
Source: PubMed Central journal article supplement (PMC7140101)
Supplement: NIHMS1026979-supplement-Supplemental_Material_2.pdf [file NIHMS1026979-supplement-Supplemental_Material_2.pdf]

Table S2. Descriptive statistics and correlations for cannabis use variables and mental health symptoms

|                  | 1.   | 2.   | 3.   | 4.   | 5.   | 6.   | 7.   | 8.   | 9.  | 10.  | 11.  | 12.  | 13. | 14.  | 15.  | 16.    | 17.    | 18.    | 19.  | 20.  | 21.  |
|------------------|------|------|------|------|------|------|------|------|-----|------|------|------|-----|------|------|--------|--------|--------|------|------|------|
| 1. Coping W7     | 1    |      |      |      |      |      |      |      |     |      |      |      |     |      |      |        |        |        |      |      |      |
| 2. Coping W8     | .64  | 1    |      |      |      |      |      |      |     |      |      |      |     |      |      |        |        |        |      |      |      |
| 3. Coping W9     | .47  | .68  | 1    |      |      |      |      |      |     |      |      |      |     |      |      |        |        |        |      |      |      |
| 4. Soc/Enh W7    | .63  | .47  | .33  | 1    |      |      |      |      |     |      |      |      |     |      |      |        |        |        |      |      |      |
| 5. Soc/Enh W8    | .24  | .55  | .37  | .55  | 1    |      |      |      |     |      |      |      |     |      |      |        |        |        |      |      |      |
| 6. Soc/Enh W9    | .26  | .47  | .58  | .46  | .62  | 1    |      |      |     |      |      |      |     |      |      |        |        |        |      |      |      |
| 7. Depression W7 | .41  | .42  | .29  | .17  | .08  | .07  | 1    |      |     |      |      |      |     |      |      |        |        |        |      |      |      |
| 8. Depression W8 | .43  | .48  | .37  | .24  | .11  | .07  | .71  | 1    |     |      |      |      |     |      |      |        |        |        |      |      |      |
| 9. Depression W9 | .33  | .42  | .39  | .20  | .13  | .08  | .62  | .76  | 1   |      |      |      |     |      |      |        |        |        |      |      |      |
| 10. Soc Anx W7   | .31  | .37  | .12  | .04  | .06  | -.04 | .59  | .57  | .47 | 1    |      |      |     |      |      |        |        |        |      |      |      |
| 11. Soc Anx W8   | .35  | .38  | .14  | .19  | .09  | .02  | .48  | .59  | .50 | .78  | 1    |      |     |      |      |        |        |        |      |      |      |
| 12. Soc Anx W9   | .33  | .32  | .22  | .23  | .06  | .04  | .46  | .52  | .57 | .72  | .84  | 1    |     |      |      |        |        |        |      |      |      |
| 13. External W7  | .36  | .39  | .33  | .29  | .16  | .17  | .57  | .52  | .41 | .26  | .21  | .17  | 1   |      |      |        |        |        |      |      |      |
| 14. External W8  | .40  | .45  | .41  | .36  | .24  | .22  | .47  | .64  | .53 | .30  | .28  | .28  | .78 | 1    |      |        |        |        |      |      |      |
| 15. External W9  | .34  | .41  | .47  | .26  | .16  | .29  | .41  | .59  | .66 | .22  | .25  | .28  | .67 | .83  | 1    |        |        |        |      |      |      |
| 16. Can Freq W7  | .45  | .42  | .44  | .45  | .25  | .33  | .15  | .15  | .15 | .02  | .05  | .03  | .29 | .29  | .28  | 1      |        |        |      |      |      |
| 17. Can Freq W8  | .44  | .52  | .58  | .39  | .34  | .46  | .19  | .24  | .21 | .00  | .08  | .09  | .26 | .36  | .30  | .71    | 1      |        |      |      |      |
| 18. Can Freq W9  | .26  | .35  | .56  | .36  | .32  | .51  | .01  | .11  | .17 | -.16 | -.07 | -.06 | .17 | .24  | .26  | .57    | .71    | 1      |      |      |      |
| 19. Can Prob W7  | .57  | .43  | .46  | .42  | .20  | .32  | .39  | .35  | .29 | .26  | .24  | .24  | .46 | .48  | .46  | .54    | .42    | .35    | 1    |      |      |
| 20. Can Prob W8  | .43  | .54  | .47  | .30  | .37  | .38  | .41  | .40  | .32 | .27  | .21  | .21  | .54 | .58  | .54  | .46    | .48    | .40    | .72  | 1    |      |
| 21. Can Prob W9  | .44  | .42  | .59  | .34  | .27  | .40  | .32  | .28  | .37 | .15  | .18  | .21  | .42 | .42  | .51  | .48    | .51    | .49    | .76  | .66  | 1    |
| Mean             | 1.94 | 2.06 | 2.08 | 2.75 | 2.94 | 2.88 | .43  | .44  | .47 | 1.06 | 1.03 | 1.08 | .42 | .42  | .42  | 7.84   | 84.41  | 101.99 | 6.04 | 6.96 | 6.44 |
| Standard Dev.    | 1.04 | 1.10 | 1.11 | 1.17 | 1.12 | 1.10 | .34  | .36  | .38 | .75  | .77  | .76  | .28 | .29  | .31  | 117.10 | 124.02 | 138.62 | 7.47 | 8.64 | 7.22 |
| Skewness         | 1.24 | 1.01 | 1.06 | .10  | .08  | .11  | 1.16 | 1.19 | .95 | 1.05 | .99  | .94  | .88 | 1.12 | 1.13 | 1.62   | 1.30   | 1.01   | 1.99 | 1.95 | 1.66 |
| Kurtosis         | 1.18 | .43  | .33  | -.96 | -.76 | -.75 | .88  | 1.34 | .37 | 1.11 | .61  | .52  | .45 | 2.07 | 1.96 | 1.18   | .22    | -.65   | 4.53 | 4.51 | 2.53 |
| Minimum          | 1.00 | 1.00 | 1.00 | 1.00 | 1.00 | 1.00 | 0    | 0    | 0   | 0    | 0    | 0    | 0   | 0    | 0    | 0      | 0      | 0      | 0    | 0    | 0    |
| Maximum          | 5.00 | 4.20 | 5.00 | 5.00 | 5.00 | 4.20 | 1.64 | 1.71 | 1.6 | 3.78 | 3.31 | 3.52 | 1.3 | 1.82 | 1.83 | 365    | 365    | 365    | 42   | 50   | 33   |

Note. Coping = Coping Motives; Soc/Enh = Social and Enhancement Motives; Depression = Depression Symptoms; Soc Anx = Social Anxiety Symptoms; External = Externalizing Symptoms; Can Freq = Frequency of cannabis use; Can Prob = Cannabis Problem  
*Italicized = Stability estimates*
