# Supplementary material
Source: PubMed Central journal article supplement (PMC7140101)
Supplement: NIHMS1026979-supplement-Supplemental_Material_4.pdf [file NIHMS1026979-supplement-Supplemental_Material_4.pdf]

Supplemental Table 4. Standardized Path Coefficients from Multivariate Models with 95% Confidence Intervals

**Path Coefficients from Alcohol and Depression Model with 95% Confidence Intervals**

| W8 Coping regressed on | Lower 2.5% | Estimate | Upper 2.5% |
|------------------------|------------|----------|------------|
| W7 Coping              | -0.044     | 0.109    | 0.262      |
| W7 Alcohol Problems    | -0.025     | 0.142    | 0.309      |
| W7 Depression          | 0.015      | 0.214    | 0.414      |
| W7 Externalizing       | -0.197     | 0.049    | 0.296      |
| W7 Alcohol Use         | -0.214     | -0.058   | 0.098      |

W9 Coping regressed on

|                     |        |        |       |
|---------------------|--------|--------|-------|
| W8 Coping           | -0.047 | 0.114  | 0.274 |
| W8 Alcohol Problems | -0.023 | 0.159  | 0.342 |
| W8 Depression       | 0.013  | 0.244  | 0.485 |
| W8 Externalizing    | -0.237 | 0.059  | 0.356 |
| W8 Alcohol Use      | -0.168 | -0.046 | 0.077 |

W8 Social Enhancement regressed on

|                       |        |        |       |
|-----------------------|--------|--------|-------|
| W7 Social Enhancement | 0.151  | 0.286  | 0.416 |
| W7 Alcohol Problems   | -0.078 | 0.079  | 0.237 |
| W7 Depression         | -0.198 | -0.024 | 0.150 |
| W7 Externalizing      | -0.141 | 0.068  | 0.277 |
| W7 Alcohol Use        | -0.297 | -0.114 | 0.068 |

W9 Social Enhancement regressed on

|                       |        |        |       |
|-----------------------|--------|--------|-------|
| W8 Social Enhancement | 0.151  | 0.294  | 0.446 |
| W8 Alcohol Problems   | -0.087 | 0.091  | 0.270 |
| W8 Depression         | -0.234 | -0.028 | 0.178 |

|                  |        |        |       |
|------------------|--------|--------|-------|
| W8 Externalizing | -0.174 | 0.084  | 0.341 |
| W8 Alcohol Use   | -0.237 | -0.093 | 0.052 |

W8 Externalizing regressed on

|                       |        |        |        |
|-----------------------|--------|--------|--------|
| W7 Externalizing      | 0.126  | 0.357  | 0.587  |
| W7 Social Enhancement | -0.075 | 0.089  | 0.252  |
| W7 Coping             | -0.170 | -0.015 | 0.139  |
| W7 Depression         | -0.027 | 0.222  | 0.470  |
| W7 Alcohol Problems   | -0.085 | 0.067  | 0.219  |
| W7 Alcohol Use        | -0.280 | -0.141 | -0.001 |

W9 Externalizing regressed on

|                       |        |        |        |
|-----------------------|--------|--------|--------|
| W8 Externalizing      | 0.146  | 0.408  | 0.671  |
| W8 Social Enhancement | -0.075 | 0.087  | 0.249  |
| W8 Coping             | -0.168 | -0.015 | 0.138  |
| W8 Depression         | -0.035 | 0.245  | 0.525  |
| W8 Alcohol Problems   | -0.093 | 0.071  | 0.236  |
| W8 Alcohol Use        | -0.202 | -0.106 | -0.010 |

W8 Alcohol Problems regressed on

|                       |        |        |       |
|-----------------------|--------|--------|-------|
| W7 Alcohol Problems   | 0.245  | 0.453  | 0.661 |
| W7 Social Enhancement | -0.080 | 0.171  | 0.422 |
| W7 Coping             | -0.137 | 0.003  | 0.143 |
| W7 Depression         | -0.240 | -0.066 | 0.107 |
| W7 Externalizing      | -0.245 | 0.003  | 0.252 |
| W7 Alcohol Use        | -0.288 | -0.098 | 0.093 |

W9 Alcohol Problems regressed on

|                       |        |        |       |
|-----------------------|--------|--------|-------|
| W8 Alcohol Problems   | 0.257  | 0.507  | 0.756 |
| W8 Social Enhancement | -0.089 | 0.175  | 0.439 |
| W8 Coping             | -0.143 | 0.003  | 0.149 |
| W8 Depression         | -0.277 | -0.077 | 0.123 |
| W8 Externalizing      | -0.293 | 0.004  | 0.302 |
| W8 Alcohol Use        | -0.224 | -0.077 | 0.070 |

W8 Depression regressed on

|                       |        |        |       |
|-----------------------|--------|--------|-------|
| W7 Social Enhancement | -0.166 | -0.005 | 0.157 |
| W7 Coping             | 0.096  | 0.277  | 0.459 |
| W7 Externalizing      | 0.180  | 0.348  | 0.516 |
| W7 Alcohol Problems   | -0.122 | 0.055  | 0.232 |
| W7 Alcohol Use        | -0.405 | -0.181 | 0.042 |

W8 Alcohol Use regressed on

|                       |        |        |       |
|-----------------------|--------|--------|-------|
| W7 Social Enhancement | -0.105 | 0.133  | 0.370 |
| W7 Coping             | -0.348 | -0.140 | 0.068 |
| W7 Depression         | -0.602 | -0.191 | 0.221 |
| W7 Alcohol Problems   | -0.001 | 0.193  | 0.387 |
| W7 Externalizing      | -0.270 | 0.110  | 0.490 |

W9 Depression regressed on

|                       |        |        |       |
|-----------------------|--------|--------|-------|
| W8 Social Enhancement | -0.166 | -0.005 | 0.157 |
| W8 Coping             | 0.097  | 0.282  | 0.466 |
| W8 Externalizing      | 0.206  | 0.408  | 0.610 |
| W8 Alcohol Problems   | -0.135 | 0.060  | 0.256 |
| W8 Alcohol Use        | -0.325 | -0.139 | 0.046 |

W9 Alcohol Use regressed on

|                       |        |        |       |
|-----------------------|--------|--------|-------|
| W8 Social Enhancement | -0.133 | 0.171  | 0.475 |
| W8 Coping             | -0.457 | -0.183 | 0.092 |
| W8 Depression         | -0.883 | -0.277 | 0.329 |
| W8 Alcohol Problems   | -0.011 | 0.271  | 0.554 |
| W8 Externalizing      | -0.403 | 0.166  | 0.734 |

**Path Coefficients from Alcohol and Social Anxiety Model with 95% Confidence Intervals**

| W8 Coping regressed on | Lower 2.5% | Estimate | Upper 2.5% |
|------------------------|------------|----------|------------|
| W7 Coping              | -0.063     | 0.073    | 0.208      |
| W7 Alcohol Problems    | 0.003      | 0.142    | 0.261      |
| W7 Social Anxiety      | 0.144      | 0.313    | 0.492      |
| W7 Externalizing       | -0.077     | 0.083    | 0.243      |
| W7 Alcohol Use         | -0.142     | 0.000    | 0.141      |

W9 Coping regressed on

|                     |        |       |       |
|---------------------|--------|-------|-------|
| W8 Coping           | -0.066 | 0.078 | 0.222 |
| W8 Alcohol Problems | 0.006  | 0.158 | 0.289 |
| W8 Social Anxiety   | 0.141  | 0.332 | 0.544 |
| W8 Externalizing    | -0.091 | 0.099 | 0.288 |
| W8 Alcohol Use      | -0.114 | 0.000 | 0.114 |

W8 Social Enhancement regressed on

|                       |        |       |       |
|-----------------------|--------|-------|-------|
| W7 Social Enhancement | 0.149  | 0.298 | 0.435 |
| W7 Alcohol Problems   | -0.099 | 0.065 | 0.228 |
| W7 Social Anxiety     | -0.039 | 0.135 | 0.309 |

|                  |        |        |       |
|------------------|--------|--------|-------|
| W7 Externalizing | -0.167 | -0.010 | 0.147 |
| W7 Alcohol Use   | -0.253 | -0.065 | 0.123 |

W9 Social Enhancement regressed on

|                       |        |        |       |
|-----------------------|--------|--------|-------|
| W8 Social Enhancement | 0.148  | 0.308  | 0.469 |
| W8 Alcohol Problems   | -0.111 | 0.074  | 0.259 |
| W8 Social Anxiety     | -0.047 | 0.149  | 0.344 |
| W8 Externalizing      | -0.203 | -0.012 | 0.178 |
| W8 Alcohol Use        | -0.203 | -0.053 | 0.096 |

W8 Social Anxiety regressed on

|                       |        |        |       |
|-----------------------|--------|--------|-------|
| W7 Social Anxiety     | 0.064  | 0.312  | 0.575 |
| W7 Social Enhancement | -0.100 | 0.095  | 0.289 |
| W7 Coping             | -0.050 | 0.100  | 0.251 |
| W7 Externalizing      | -0.086 | 0.077  | 0.240 |
| W7 Alcohol Problems   | -0.135 | -0.007 | 0.122 |
| W7 Alcohol Use        | -0.190 | -0.050 | 0.090 |

W9 Social Anxiety regressed on

|                       |        |        |       |
|-----------------------|--------|--------|-------|
| W8 Social Anxiety     | 0.052  | 0.334  | 0.635 |
| W8 Social Enhancement | -0.106 | 0.098  | 0.302 |
| W8 Coping             | -0.055 | 0.107  | 0.269 |
| W8 Externalizing      | -0.103 | 0.092  | 0.286 |
| W8 Alcohol Problems   | -0.152 | -0.008 | 0.136 |
| W8 Alcohol Use        | -0.153 | -0.040 | 0.073 |

W8 Externalizing regressed on

|                  |       |       |       |
|------------------|-------|-------|-------|
| W7 Externalizing | 0.354 | 0.480 | 0.606 |
|------------------|-------|-------|-------|

|                       |        |        |       |
|-----------------------|--------|--------|-------|
| W7 Social Enhancement | -0.109 | 0.052  | 0.214 |
| W7 Coping             | -0.200 | -0.063 | 0.075 |
| W7 Social Anxiety     | 0.039  | 0.213  | 0.347 |
| W7 Alcohol Problems   | -0.076 | 0.075  | 0.227 |
| W7 Alcohol Use        | -0.239 | -0.118 | 0.003 |

W9 Externalizing regressed on

|                       |        |        |        |
|-----------------------|--------|--------|--------|
| W8 Externalizing      | 0.391  | 0.542  | 0.703  |
| W8 Social Enhancement | -0.109 | 0.052  | 0.213  |
| W8 Coping             | -0.204 | -0.064 | 0.076  |
| W8 Social Anxiety     | 0.034  | 0.208  | 0.363  |
| W8 Alcohol Problems   | -0.083 | 0.081  | 0.245  |
| W8 Alcohol Use        | -0.180 | -0.091 | -0.001 |

W8 Alcohol Problems regressed on

|                       |        |        |       |
|-----------------------|--------|--------|-------|
| W7 Alcohol Problems   | 0.253  | 0.458  | 0.648 |
| W7 Social Enhancement | -0.050 | 0.176  | 0.402 |
| W7 Coping             | -0.107 | 0.018  | 0.142 |
| W7 Social Anxiety     | -0.209 | -0.060 | 0.090 |
| W7 Externalizing      | -0.178 | -0.007 | 0.164 |
| W7 Alcohol Use        | -0.275 | -0.107 | 0.061 |

W9 Alcohol Problems regressed on

|                       |        |        |       |
|-----------------------|--------|--------|-------|
| W8 Alcohol Problems   | 0.266  | 0.524  | 0.741 |
| W8 Social Enhancement | -0.057 | 0.182  | 0.421 |
| W8 Coping             | -0.115 | 0.019  | 0.152 |
| W8 Social Anxiety     | -0.225 | -0.064 | 0.096 |
| W8 Externalizing      | -0.212 | -0.008 | 0.196 |

|                |        |        |       |
|----------------|--------|--------|-------|
| W8 Alcohol Use | -0.219 | -0.086 | 0.047 |
|----------------|--------|--------|-------|

W8 Alcohol Use regressed on

|                       |        |        |       |
|-----------------------|--------|--------|-------|
| W7 Social Enhancement | -0.043 | 0.163  | 0.369 |
| W7 Coping             | -0.260 | -0.087 | 0.086 |
| W7 Social Anxiety     | -0.342 | -0.156 | 0.030 |
| W7 Alcohol Problems   | 0.010  | 0.166  | 0.363 |
| W7 Externalizing      | -0.159 | 0.023  | 0.206 |

W9 Alcohol Use regressed on

|                       |        |        |       |
|-----------------------|--------|--------|-------|
| W8 Social Enhancement | -0.052 | 0.212  | 0.475 |
| W8 Coping             | -0.347 | -0.116 | 0.115 |
| W8 Social Anxiety     | -0.453 | -0.211 | 0.031 |
| W8 Alcohol Problems   | 0.009  | 0.261  | 0.513 |
| W8 Externalizing      | -0.236 | 0.035  | 0.306 |

**Path Coefficients from Cannabis and Depression Model with 95% Confidence Intervals**

| W8 Coping regressed on | Lower 2.5% | Estimate | Upper 2.5% |
|------------------------|------------|----------|------------|
| W7 Coping              | 0.122      | 0.271    | 0.440      |
| W7 Cannabis Problems   | -0.307     | -0.083   | 0.142      |
| W7 Depression          | -0.058     | 0.154    | 0.365      |
| W7 Externalizing       | -0.105     | 0.081    | 0.266      |
| W7 Cannabis Use        | -0.040     | 0.152    | 0.344      |

W9 Coping regressed on

|                      |        |        |       |
|----------------------|--------|--------|-------|
| W8 Coping            | 0.128  | 0.290  | 0.473 |
| W8 Cannabis Problems | -0.303 | -0.081 | 0.141 |

|                  |        |       |       |
|------------------|--------|-------|-------|
| W8 Depression    | -0.065 | 0.172 | 0.409 |
| W8 Externalizing | -0.124 | 0.095 | 0.315 |
| W8 Cannabis Use  | -0.043 | 0.166 | 0.375 |

W8 Externalizing regressed on

|                       |        |        |       |
|-----------------------|--------|--------|-------|
| W7 Externalizing      | 0.237  | 0.406  | 0.556 |
| W7 Social Enhancement | -0.090 | 0.042  | 0.173 |
| W7 Coping             | -0.087 | 0.062  | 0.211 |
| W7 Depression         | 0.003  | 0.199  | 0.395 |
| W7 Cannabis Problems  | -0.057 | 0.096  | 0.248 |
| W7 Cannabis Use       | -0.225 | -0.085 | 0.056 |

W9 Externalizing regressed on

|                       |        |        |       |
|-----------------------|--------|--------|-------|
| W8 Externalizing      | 0.270  | 0.473  | 0.635 |
| W8 Social Enhancement | -0.085 | 0.039  | 0.163 |
| W8 Coping             | -0.090 | 0.064  | 0.218 |
| W8 Depression         | -0.001 | 0.216  | 0.434 |
| W8 Cannabis Problems  | -0.055 | 0.090  | 0.235 |
| W8 Cannabis Use       | -0.237 | -0.089 | 0.058 |

W8 Social Enhancement regressed on

|                      |        |        |       |
|----------------------|--------|--------|-------|
| W7 Cannabis Problems | -0.092 | 0.118  | 0.328 |
| W7 Depression        | -0.373 | -0.107 | 0.158 |
| W7 Externalizing     | -0.133 | 0.122  | 0.376 |
| W7 Cannabis Use      | -0.094 | 0.169  | 0.431 |

W8 Cannabis Problems regressed on

|                       |        |       |       |
|-----------------------|--------|-------|-------|
| W7 Social Enhancement | -0.237 | 0.088 | 0.413 |
|-----------------------|--------|-------|-------|



|                  |        |        |       |
|------------------|--------|--------|-------|
| W7 Coping        | -0.406 | -0.104 | 0.199 |
| W7 Depression    | -0.343 | 0.002  | 0.348 |
| W7 Externalizing | -0.108 | 0.208  | 0.523 |
| W7 Cannabis Use  | -0.237 | 0.095  | 0.428 |

W8 Depression regressed on

|                       |          |       |       |
|-----------------------|----------|-------|-------|
| W7 Social Enhancement | -0.199 - | 0.041 | 0.117 |
| W7 Coping             | 0.027    | 0.204 | 0.386 |
| W7 Externalizing      | 0.190    | 0.354 | 0.520 |
| W7 Cannabis Problems  | -0.190   | 0.004 | 0.198 |
| W7 Cannabis Use       | -0.068   | 0.213 | 0.494 |

W8 Cannabis Use regressed on

|                       |        |        |       |
|-----------------------|--------|--------|-------|
| W7 Coping             | -0.268 | 0.089  | 0.446 |
| W7 Social Enhancement | -0.170 | 0.091  | 0.353 |
| W7 Cannabis Problems  | -0.352 | -0.040 | 0.271 |
| W7 Depression         | 0.269  | 0.574  | 0.883 |
| W7 Externalizing      | -0.603 | -0.295 | 0.013 |

W9 Social Enhancement regressed on

|                      |        |        |       |
|----------------------|--------|--------|-------|
| W8 Cannabis Problems | -0.099 | 0.121  | 0.341 |
| W8 Depression        | -0.437 | -0.126 | 0.185 |
| W8 Externalizing     | -0.167 | 0.151  | 0.468 |
| W8 Cannabis Use      | -0.102 | 0.193  | 0.489 |

W9 Cannabis Problems regressed on

|                       |        |        |       |
|-----------------------|--------|--------|-------|
| W8 Social Enhancement | -0.241 | 0.090  | 0.421 |
| W8 Coping             | -0.452 | -0.116 | 0.221 |

|                  |        |       |       |
|------------------|--------|-------|-------|
| W8 Depression    | -0.402 | 0.003 | 0.407 |
| W8 Externalizing | -0.132 | 0.256 | 0.644 |
| W8 Cannabis Use  | -0.274 | 0.109 | 0.491 |

W9 Depression regressed on

|                       |        |        |       |
|-----------------------|--------|--------|-------|
| W8 Social Enhancement | -0.188 | -0.039 | 0.110 |
| W8 Coping             | 0.029  | 0.204  | 0.401 |
| W8 Externalizing      | 0.212  | 0.403  | 0.604 |
| W8 Cannabis Problems  | -0.181 | 0.004  | 0.189 |
| W8 Cannabis Use       | -0.085 | 0.226  | 0.537 |

W9 Cannabis Use regressed on

|                       |        |        |       |
|-----------------------|--------|--------|-------|
| W8 Coping             | -0.293 | 0.098  | 0.488 |
| W8 Social Enhancement | -0.172 | 0.091  | 0.354 |
| W8 Cannabis Problems  | -0.352 | -0.040 | 0.271 |
| W8 Depression         | 0.303  | 0.652  | 1.020 |
| W8 Externalizing      | -0.737 | -0.356 | 0.024 |

**Path Coefficients from Cannabis and Social Anxiety Model with 95% Confidence Intervals**

| W8 Coping regressed on | Lower 2.5% | Estimate | Upper 2.5% |
|------------------------|------------|----------|------------|
| W7 Coping              | 0.049      | 0.237    | 0.426      |
| W7 Cannabis Problems   | -0.508     | -0.226   | 0.056      |
| W7 Social Anxiety      | -0.071     | 0.154    | 0.378      |
| W7 Externalizing       | -0.050     | 0.216    | 0.482      |
| W7 Cannabis Use        | -0.112     | 0.174    | 0.460      |

W9 Coping regressed on

|                      |        |        |       |
|----------------------|--------|--------|-------|
| W8 Coping            | 0.037  | 0.267  | 0.498 |
| W8 Cannabis Problems | -0.415 | -0.079 | 0.256 |
| W8 Social Anxiety    | -0.327 | -0.067 | 0.194 |
| W8 Externalizing     | -0.139 | 0.151  | 0.442 |
| W8 Cannabis Use      | -0.104 | 0.259  | 0.621 |

W8 Social Anxiety regressed on

|                       |        |        |       |
|-----------------------|--------|--------|-------|
| W7 Social Anxiety     | 0.177  | 0.416  | 0.650 |
| W7 Social Enhancement | -0.153 | 0.310  | 0.773 |
| W7 Coping             | -0.459 | 0.029  | 0.51  |
| W7 Externalizing      | -0.367 | -0.126 | 0.114 |
| W7 Cannabis Problems  | -0.417 | -0.104 | 0.209 |
| W7 Cannabis Use       | -0.356 | 0.012  | 0.380 |

W9 Social Anxiety regressed on

|                       |        |        |       |
|-----------------------|--------|--------|-------|
| W8 Social Anxiety     | 0.146  | 0.447  | 0.736 |
| W8 Social Enhancement | -0.395 | -0.158 | 0.079 |
| W8 Coping             | -0.193 | 0.055  | 0.303 |
| W8 Externalizing      | -0.074 | 0.156  | 0.386 |
| W8 Cannabis Problems  | -0.380 | -0.166 | 0.048 |
| W8 Cannabis Use       | -0.131 | 0.184  | 0.499 |

W8 Externalizing regressed on

|                       |        |        |       |
|-----------------------|--------|--------|-------|
| W7 Externalizing      | 0.377  | 0.479  | 0.581 |
| W7 Social Enhancement | -0.139 | 0.169  | 0.477 |
| W7 Coping             | -0.301 | -0.002 | 0.297 |
| W7 Social Anxiety     | -0.106 | 0.128  | 0.362 |
| W7 Cannabis Problems  | -0.205 | 0.043  | 0.291 |

|                 |        |        |       |
|-----------------|--------|--------|-------|
| W7 Cannabis Use | -0.369 | -0.115 | 0.140 |
|-----------------|--------|--------|-------|

W9 Externalizing regressed on

|                       |        |        |       |
|-----------------------|--------|--------|-------|
| W8 Externalizing      | 0.339  | 0.491  | 0.643 |
| W8 Social Enhancement | -0.392 | -0.171 | 0.049 |
| W8 Coping             | -0.158 | 0.080  | 0.318 |
| W8 Social Anxiety     | -0.006 | 0.209  | 0.423 |
| W8 Cannabis Problems  | 0.072  | 0.238  | 0.404 |
| W8 Cannabis Use       | -0.304 | -0.068 | 0.167 |

W8 Social Enhancement regressed on

|                      |        |        |       |
|----------------------|--------|--------|-------|
| W7 Cannabis Problems | -0.555 | -0.234 | 0.088 |
| W7 Social Anxiety    | -0.480 | -0.181 | 0.118 |
| W7 Externalizing     | -0.447 | 0.019  | 0.485 |
| W7 Cannabis Use      | -0.233 | 0.191  | 0.616 |

W8 Cannabis Problems regressed on

|                       |        |        |       |
|-----------------------|--------|--------|-------|
| W7 Social Enhancement | -0.833 | -0.309 | 0.215 |
| W7 Coping             | -0.321 | 0.158  | 0.638 |
| W7 Social Anxiety     | -0.735 | -0.229 | 0.278 |
| W7 Externalizing      | -0.018 | 0.475  | 0.968 |
| W7 Cannabis Use       | -0.421 | 0.157  | 0.736 |

W8 Cannabis Use regressed on

|                       |        |        |       |
|-----------------------|--------|--------|-------|
| W7 Coping             | -0.494 | 0.257  | 1.008 |
| W7 Social Enhancement | -0.689 | 0.037  | 0.764 |
| W7 Cannabis Problems  | -0.538 | -0.020 | 0.499 |
| W7 Social Anxiety     | -0.283 | 0.177  | 0.637 |

|                  |        |       |       |
|------------------|--------|-------|-------|
| W7 Externalizing | -0.340 | 0.055 | 0.450 |
|------------------|--------|-------|-------|

W9 Social Enhancement regressed on

|                      |        |        |       |
|----------------------|--------|--------|-------|
| W8 Cannabis Problems | -0.151 | 0.171  | 0.493 |
| W8 Social Anxiety    | -0.290 | 0.064  | 0.418 |
| W8 Externalizing     | -0.442 | -0.113 | 0.215 |
| W8 Cannabis Use      | -0.106 | 0.234  | 0.573 |

W9 Cannabis Problems regressed on

|                       |        |        |       |
|-----------------------|--------|--------|-------|
| W8 Social Enhancement | -0.499 | -0.107 | 0.286 |
| W8 Coping             | -0.524 | -0.122 | 0.279 |
| W8 Social Anxiety     | -0.456 | -0.024 | 0.409 |
| W8 Externalizing      | -0.274 | 0.093  | 0.460 |
| W8 Cannabis Use       | -0.410 | 0.168  | 0.747 |

W9 Cannabis Use regressed on

|                       |        |       |       |
|-----------------------|--------|-------|-------|
| W8 Coping             | -0.605 | 0.134 | 0.336 |
| W8 Social Enhancement | -0.371 | 0.103 | 0.578 |
| W8 Cannabis Problems  | -0.407 | 0.135 | 0.677 |
| W8 Social Anxiety     | -0.284 | 0.156 | 0.597 |
| W8 Externalizing      | -0.529 | 0.002 | 0.534 |
